# Supplementary material
Source: Springer Nature journal article supplement (https://www.springermedizin.de/resource/supplementary/13256_2013_2788_MOESM1_ESM.pdf/9650534)

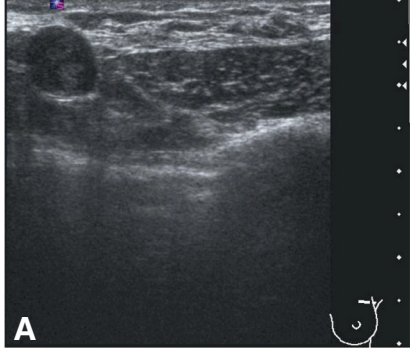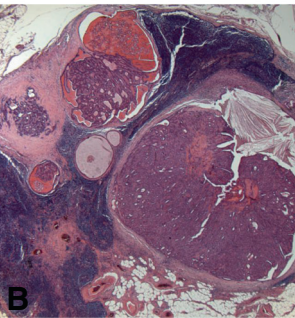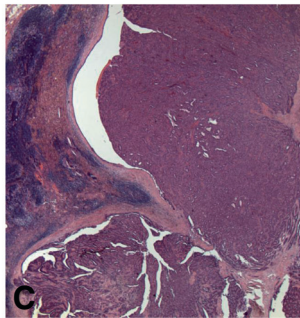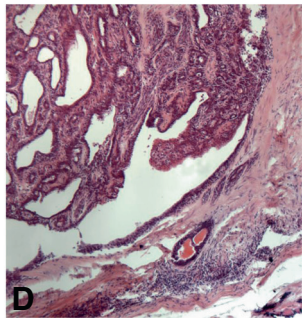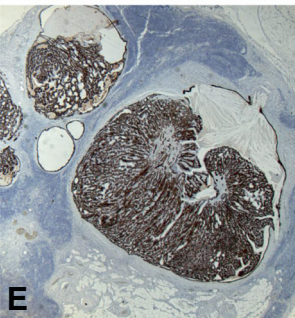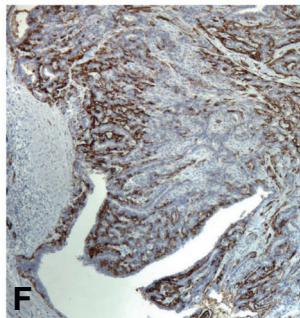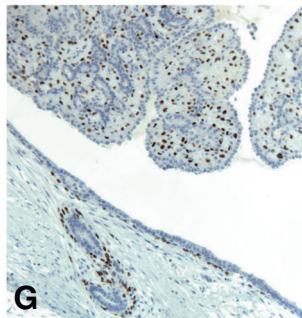

Supplement: MOESM1 [file 9650534]
